# Supplementary material
Source: PubMed Central journal article supplement (PMC4906944)

# IL-10

## A

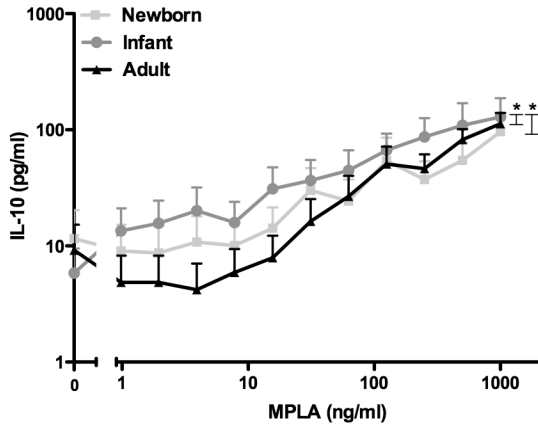

## B

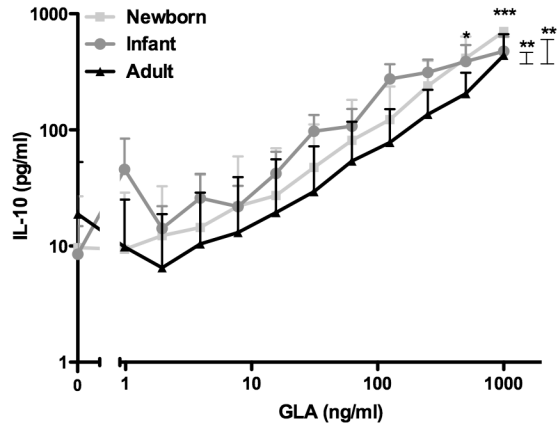

## C

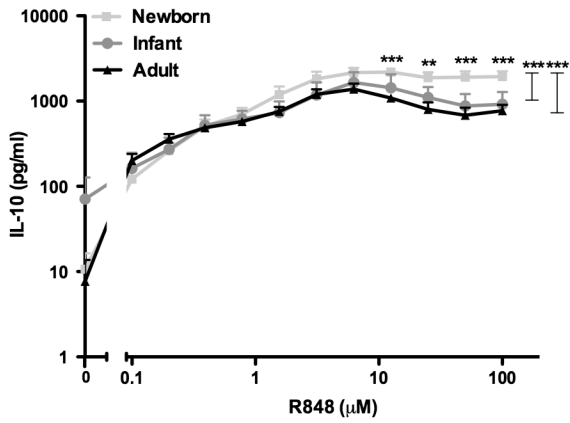

## D

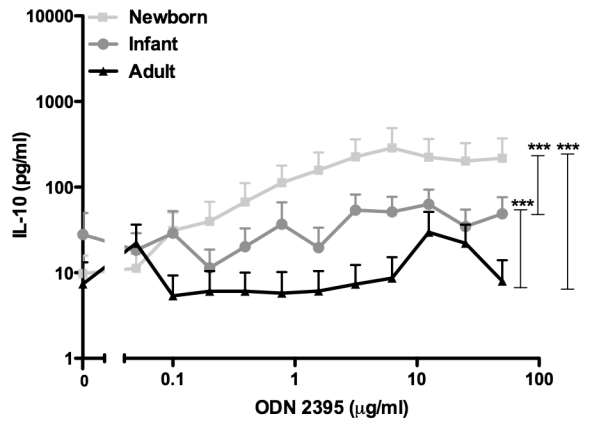

# IL-6

**A**

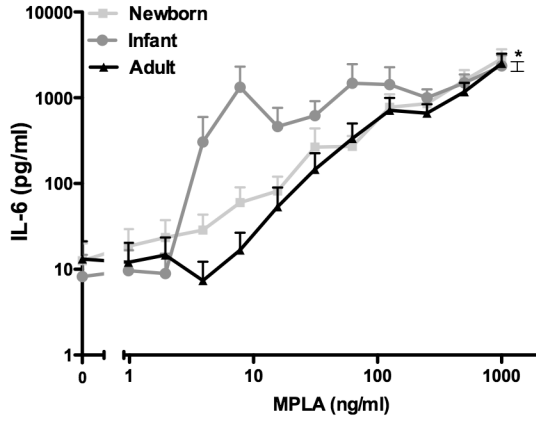

**B**

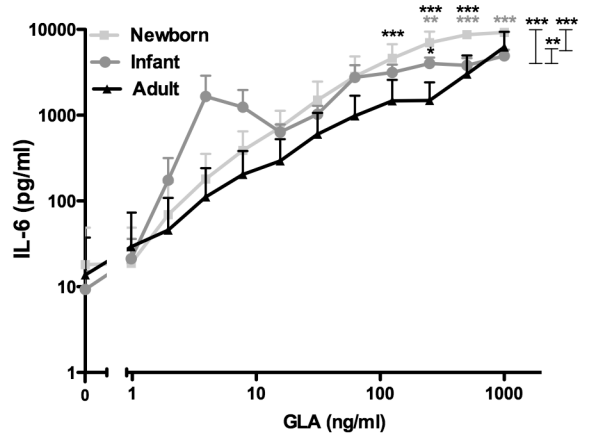

**C**

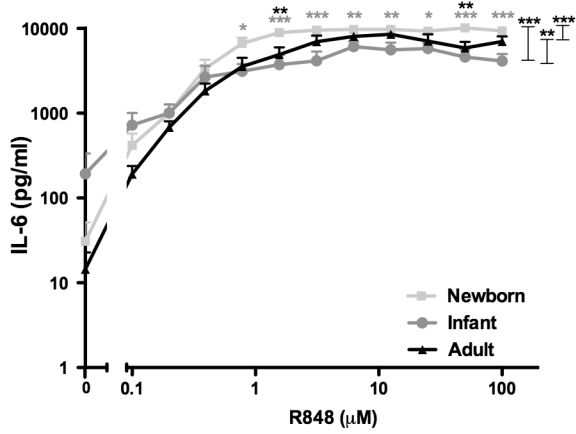

**D**

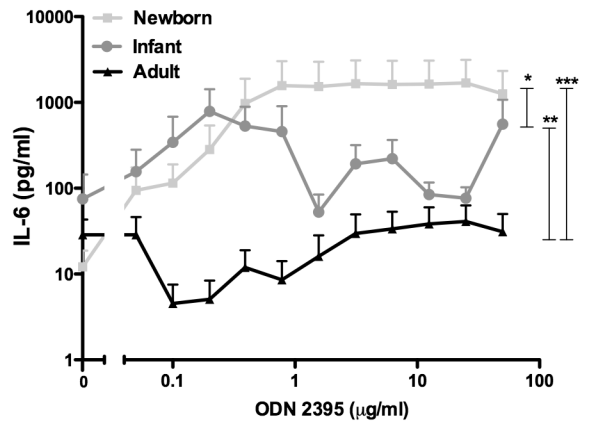

# IL-1 $\beta$

**A**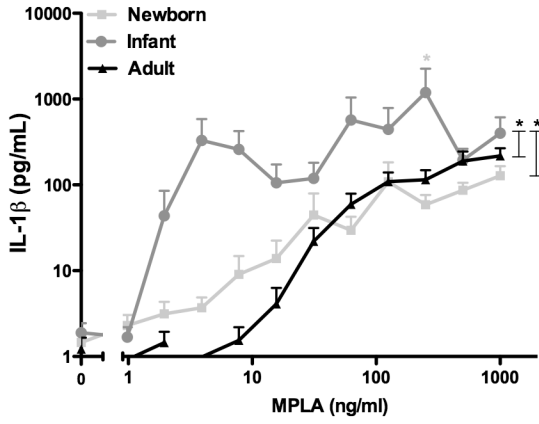**B**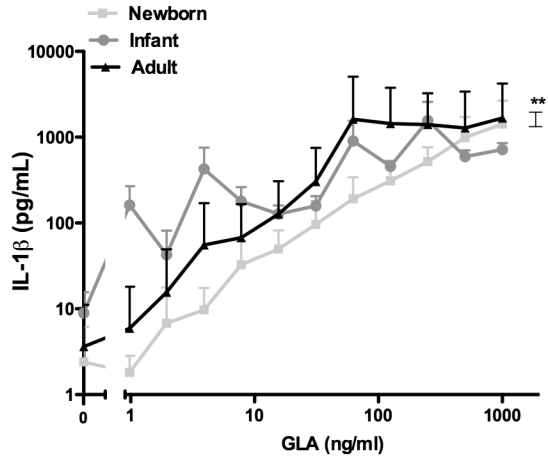**C**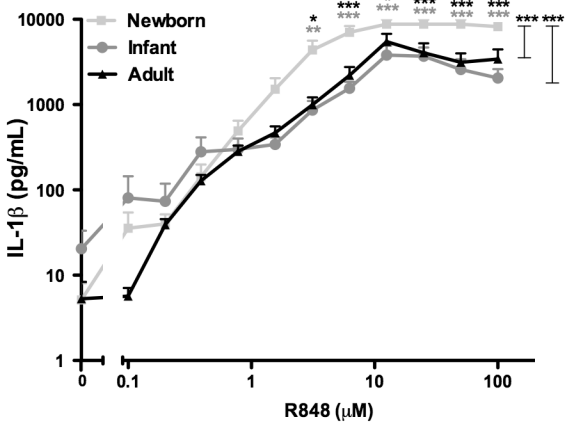**D**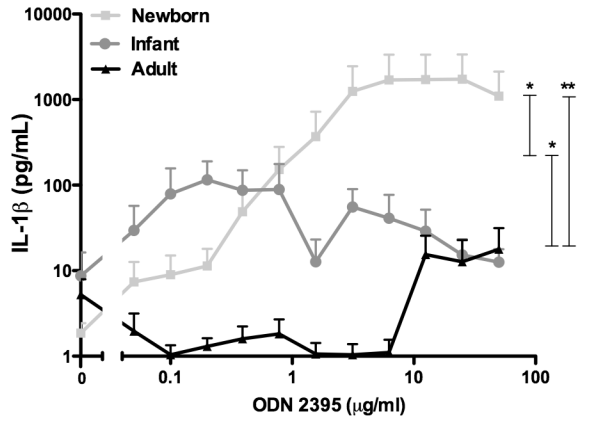

# CXCL8

**A**

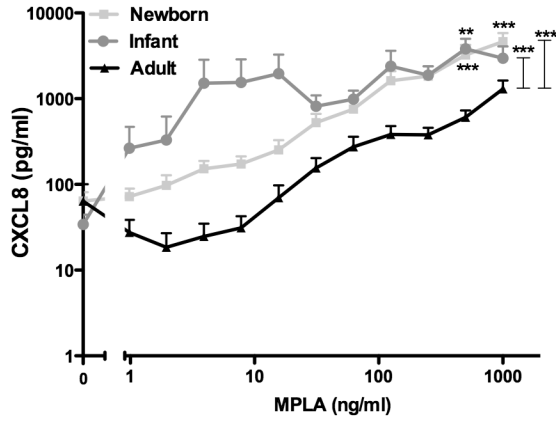

**B**

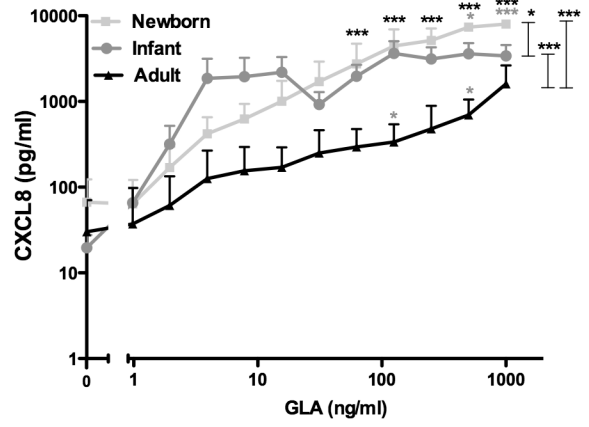

**C**

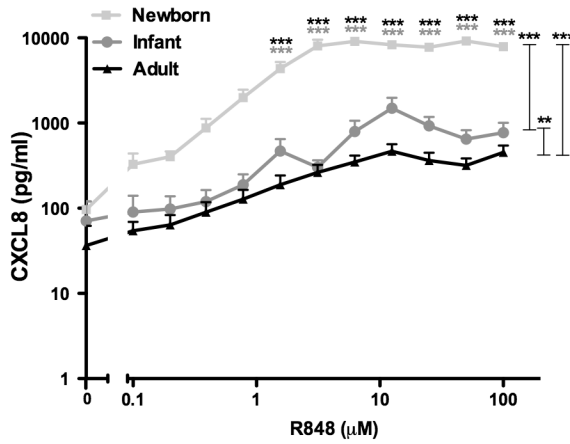

**D**

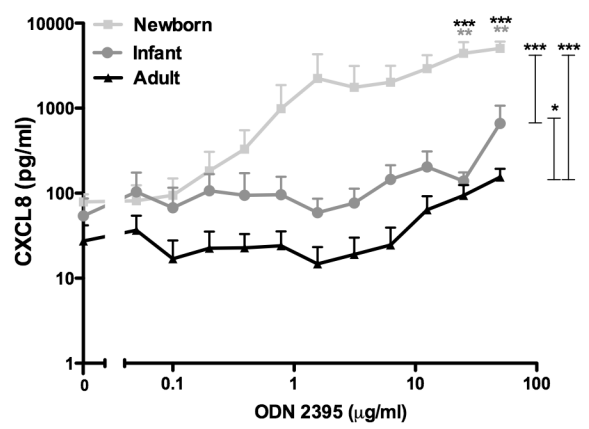

# CCL2

## A

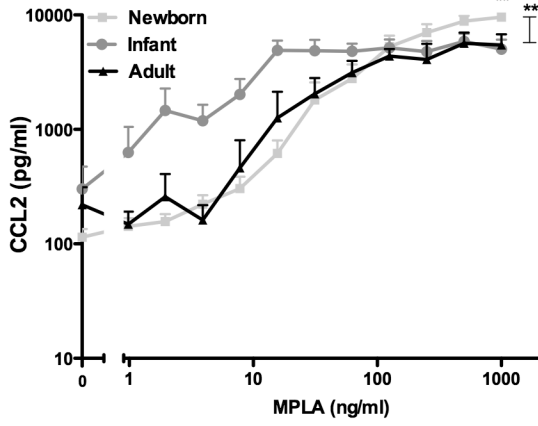

## B

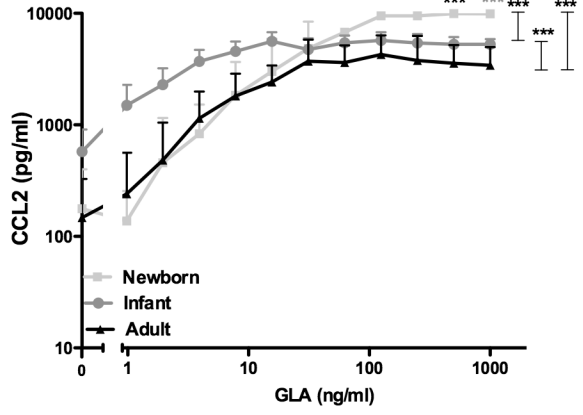

## C

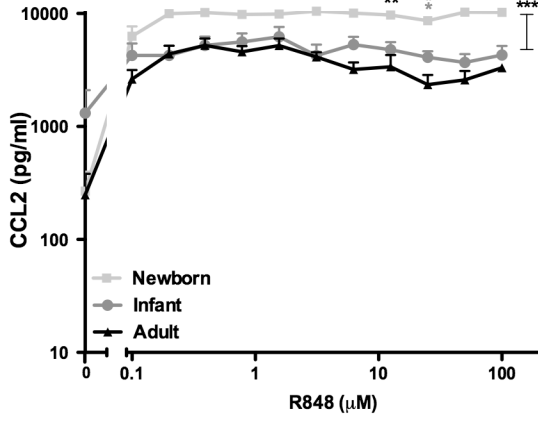

## D

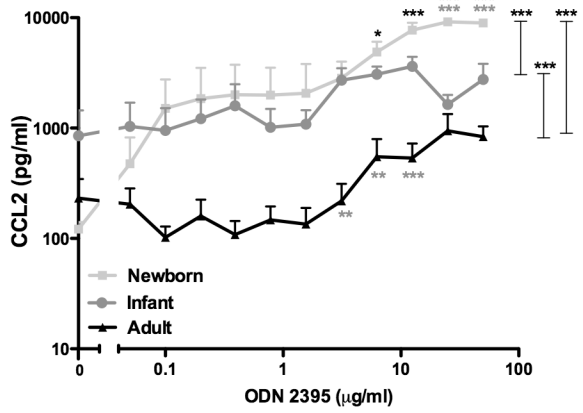

# CCL4

## A

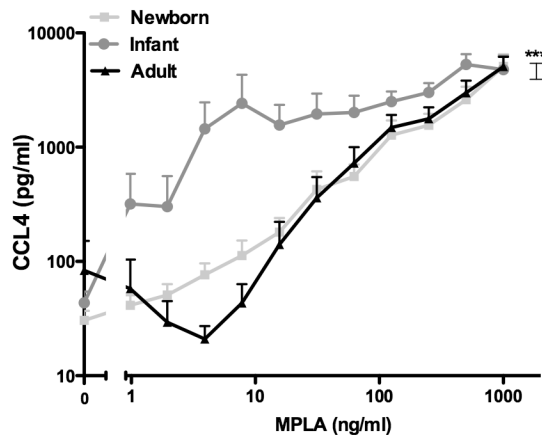

## B

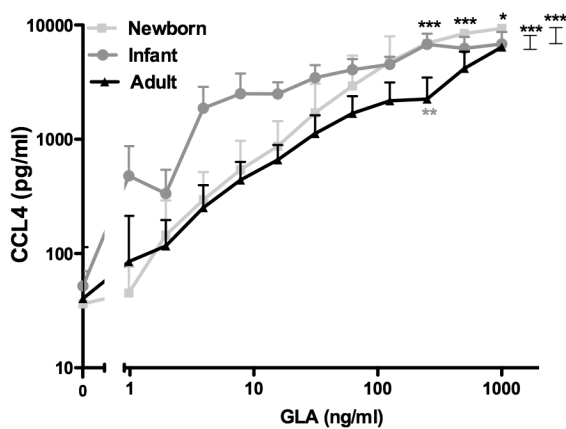

## C

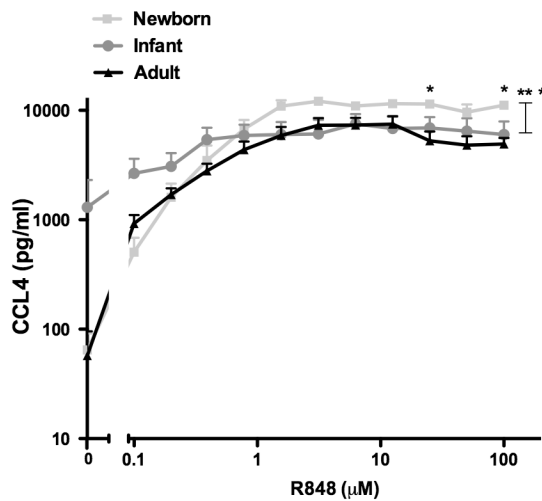

## D

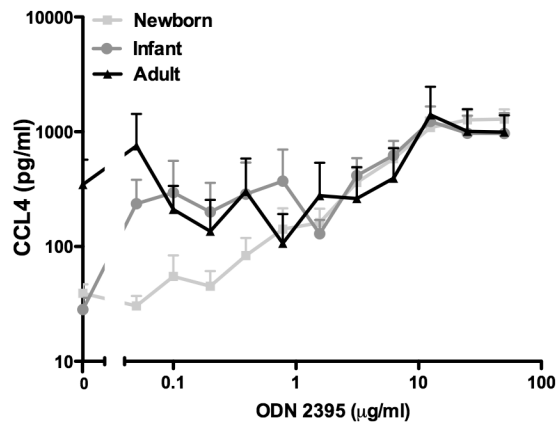

# CCL5

## A

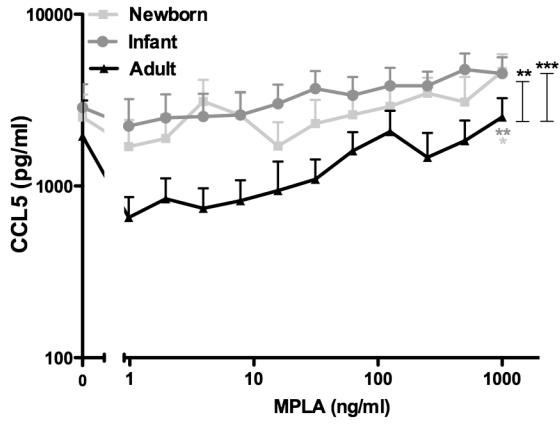

## B

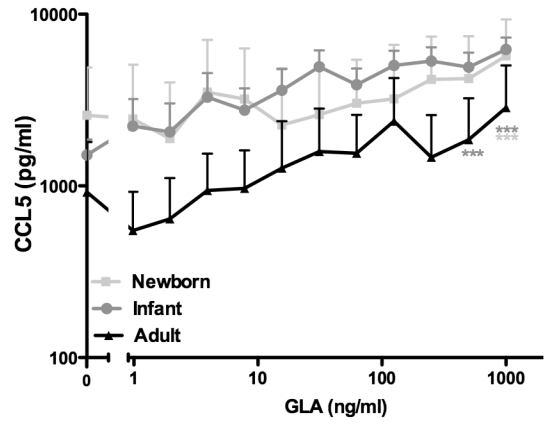

## C

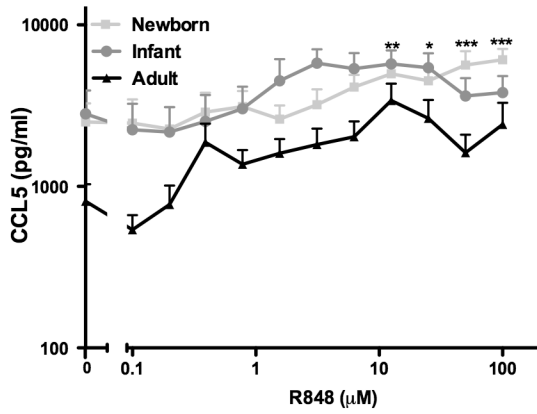

## D

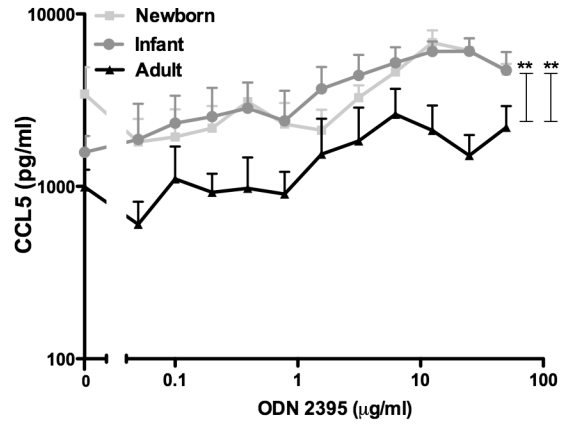

# Prostaglandin E<sub>2</sub>

**A**

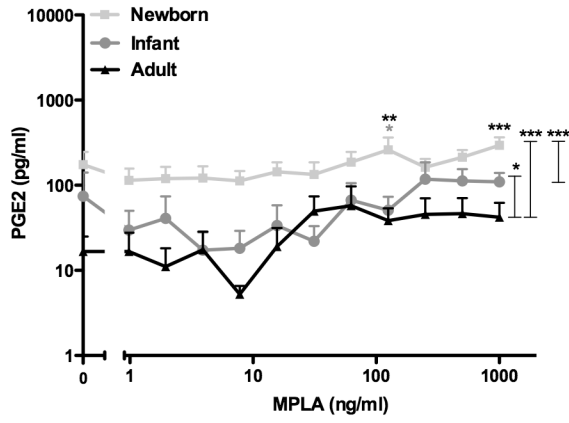

**B**

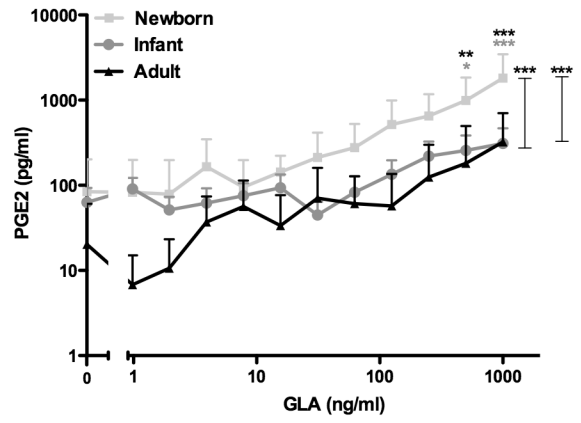

**C**

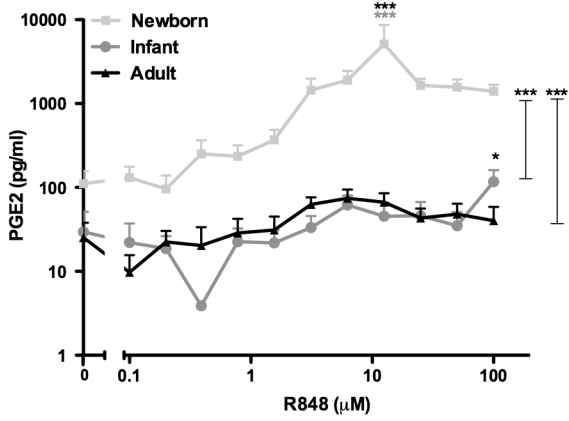

**D**

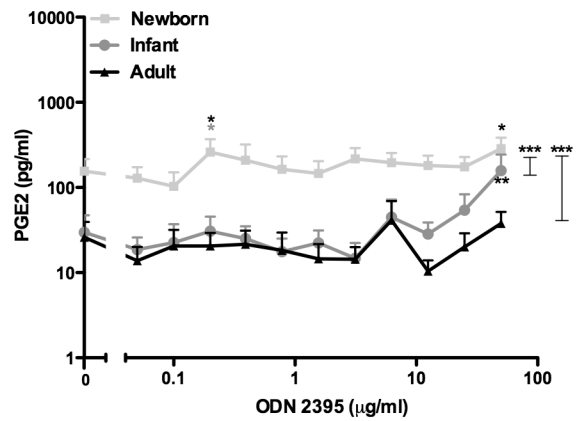



# IFN- $\alpha$

**A**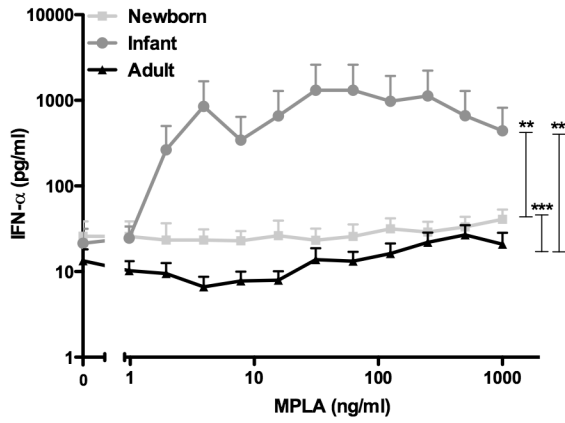**B**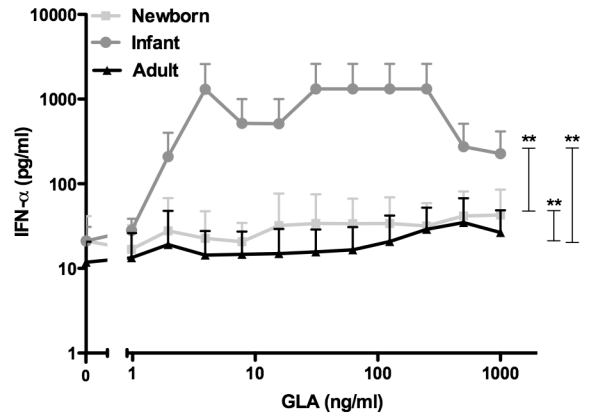**C**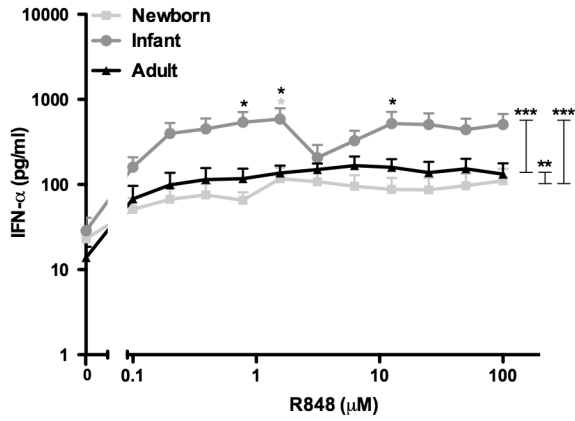**D**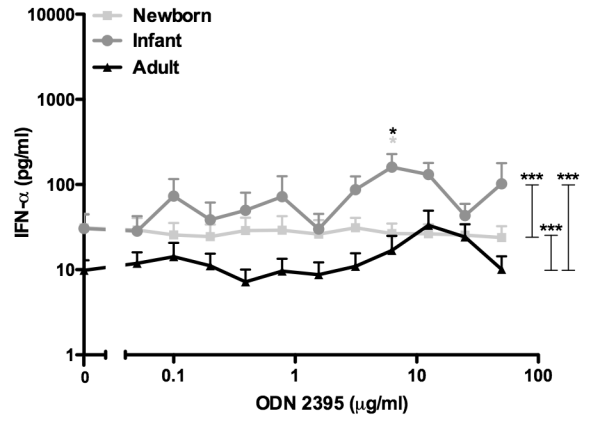

# TNF

## A

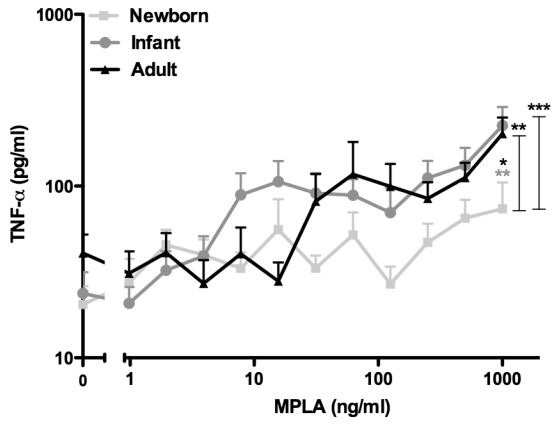

## B

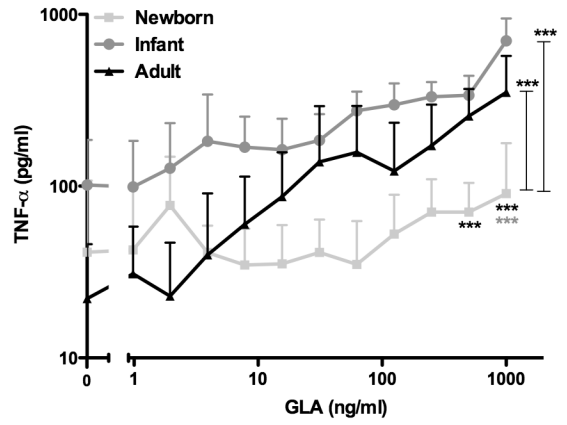

## C

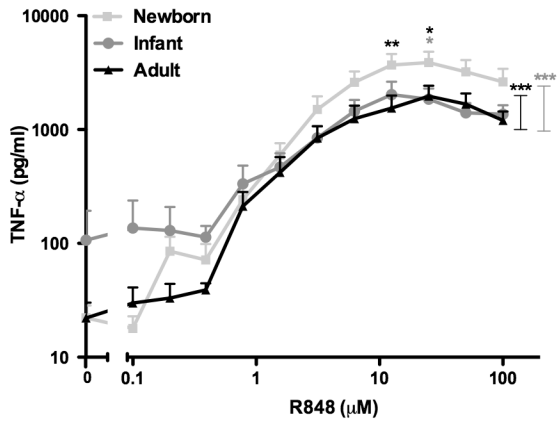

## D

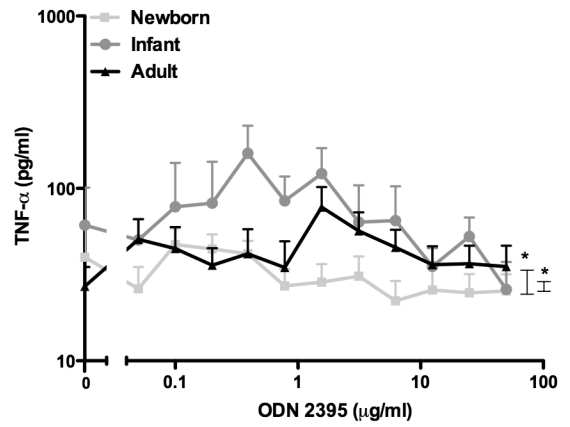

# GM-CSF

**A**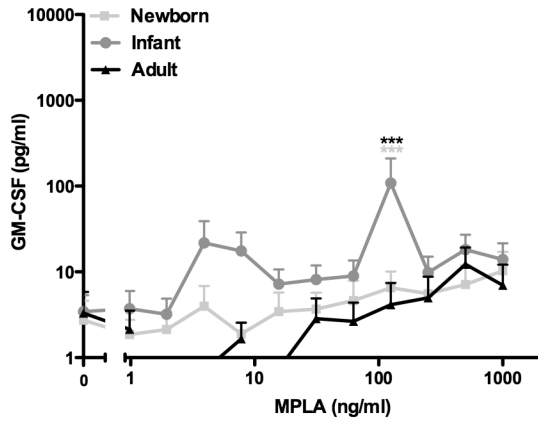**B**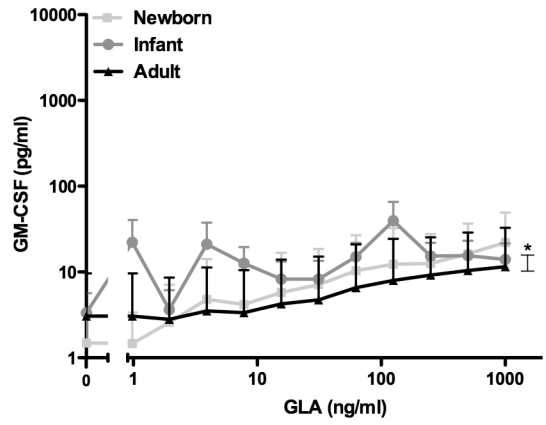**C**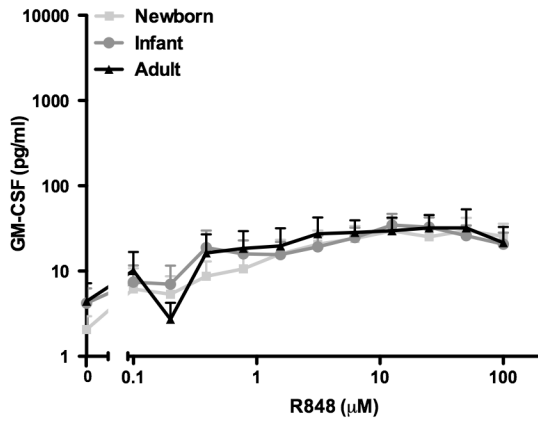**D**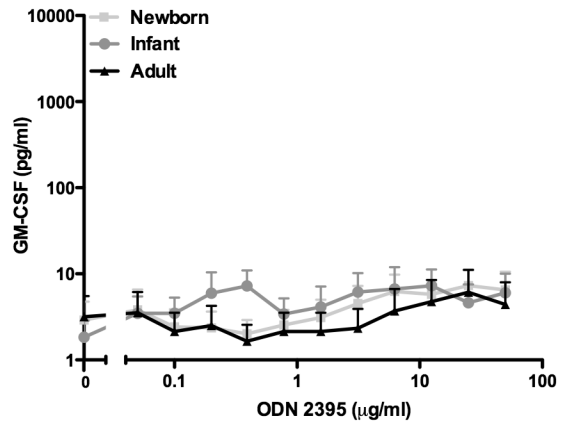

# CXCL10

## A

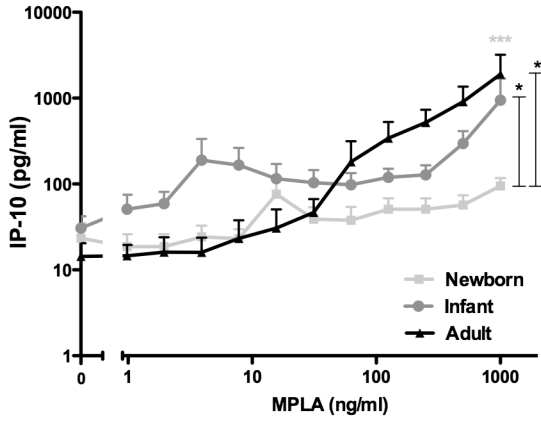

## B

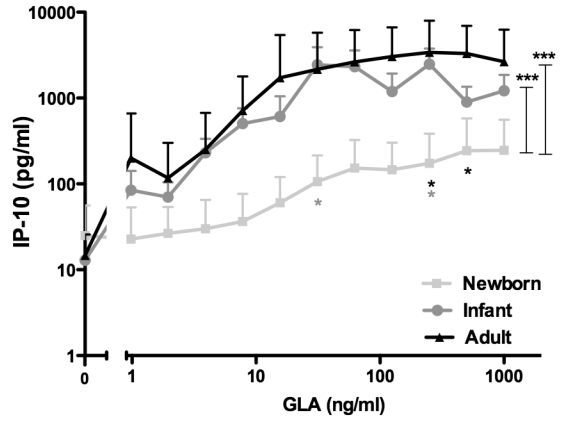

## C

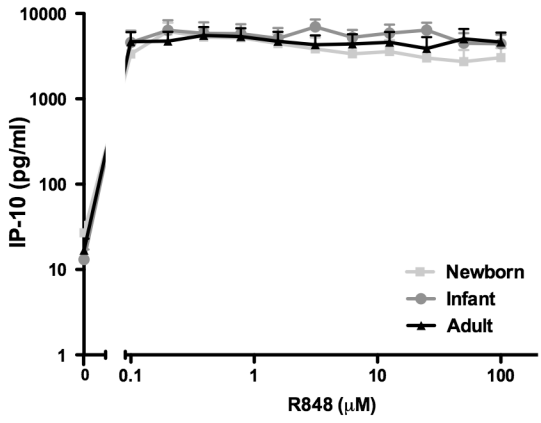

## D

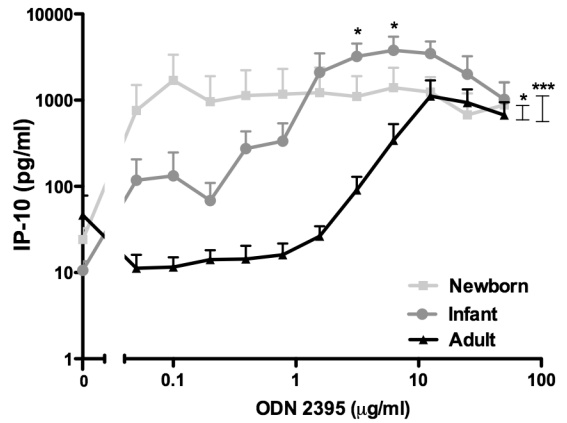

# IFN- $\gamma$

## A

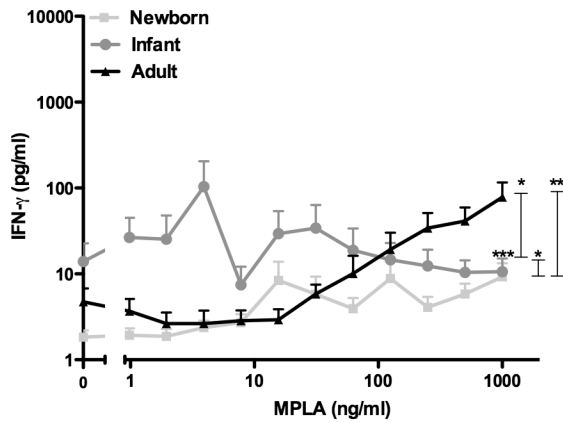

## B

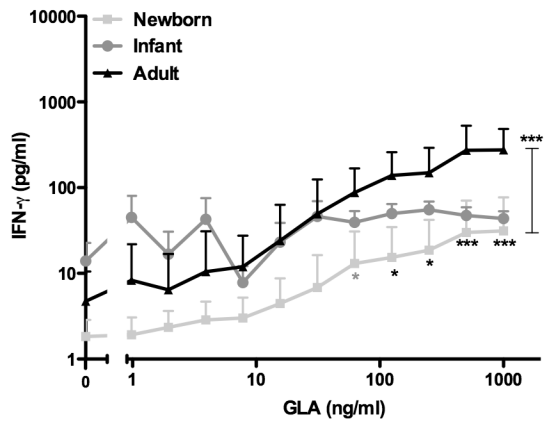

## C

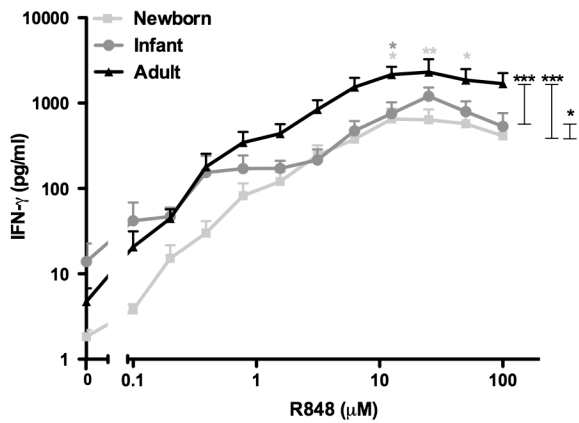

## D

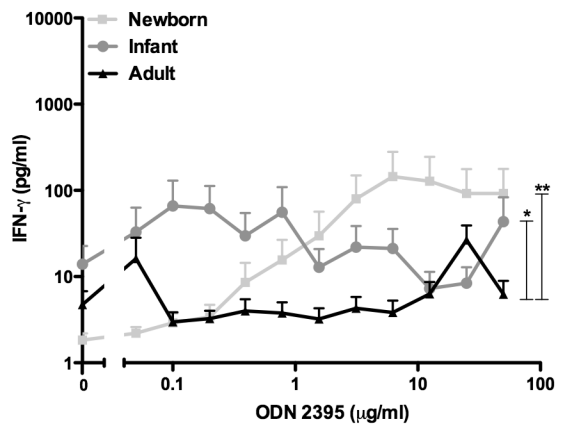

# IL-12p40

## A

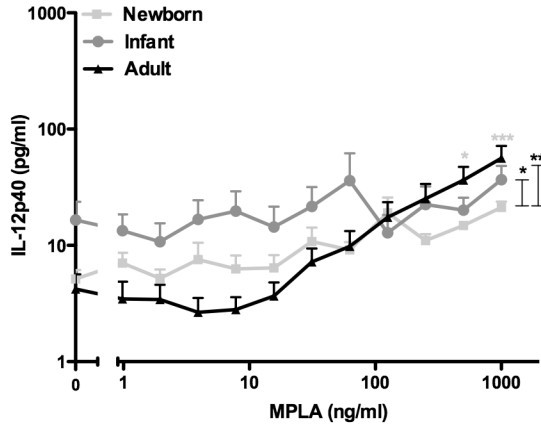

## B

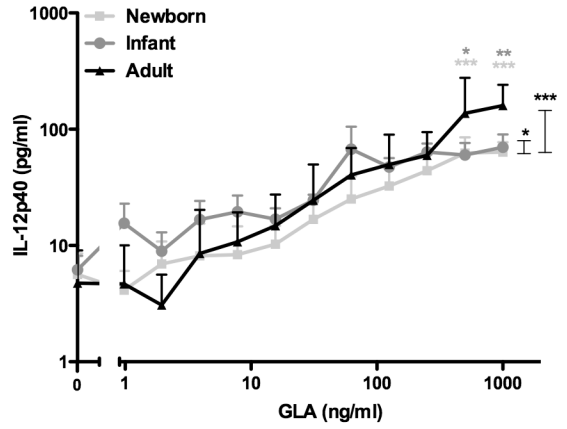

## C

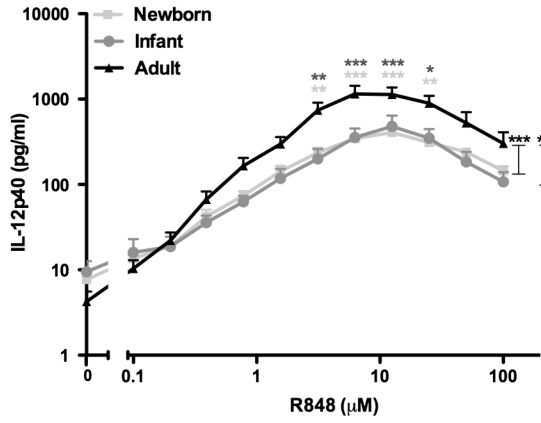

## D

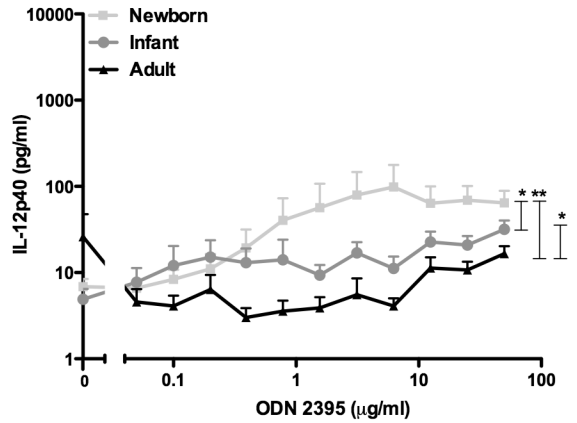

# IL-12p70

## A

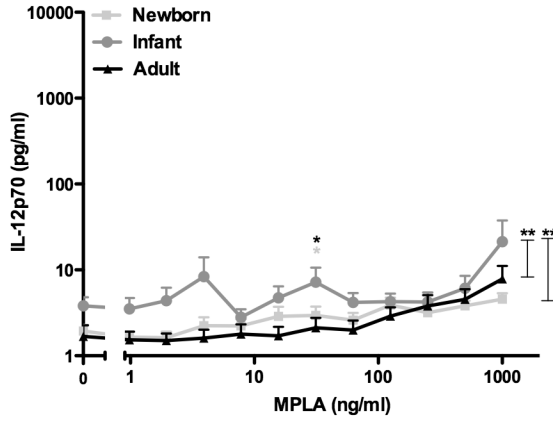

## B

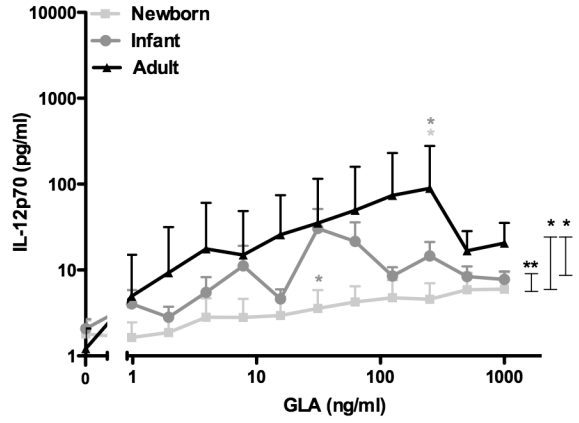

## C

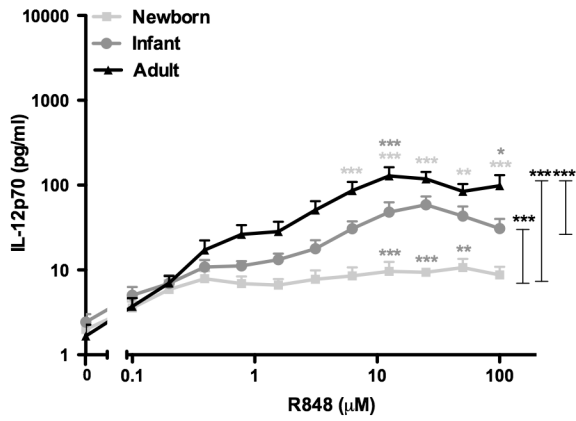

## D

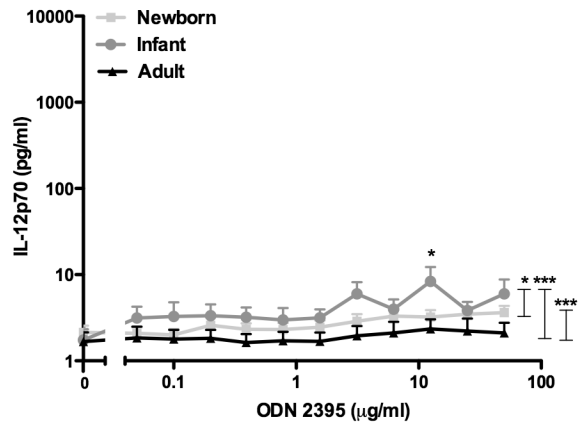

Supplement: NIHMS777700-supplement.pdf [file NIHMS777700-supplement.pdf]
